# Supplementary material for: Efficient Advanced Oxidation Process (AOP) for Photocatalytic Contaminant Degradation Using Exfoliated Metal-Free Graphitic Carbon Nitride and Visible Light-Emitting Diodes
Source: MDPI journal article supplement (doi:10.3390/catal11060662), 2021-05-23
Supplement: s1 [file s1]

Archive with 1 entries (1 files):
- catalysts-1222332-supplementary.pdf
